# Supplementary material for: Energetics and structure of alanine-rich α-helices via adaptive steered molecular dynamics
Source: PubMed Central journal article supplement — Biophys J. 2021 Mar 26;120(10):2009–18. doi: 10.1016/j.bpj.2021.03.017 (PMC8204395; doi:10.1016/j.bpj.2021.03.017), 2021-03-26
Supplement: mmc2.pdf [file mmc2.pdf]

# Energetics and structure of alanine-rich $\alpha$ -helices via adaptive steered molecular dynamics

Yi Zhuang,<sup>1</sup> Hailey R. Bureau,<sup>1</sup> Christine Lopez,<sup>1</sup> Ryan Bucher,<sup>1</sup> Stephen Quirk,<sup>2</sup> and Rigoberto Hernandez<sup>1,3,\*</sup>

<sup>1</sup>Department of Chemistry, Johns Hopkins University, Baltimore, Maryland; <sup>2</sup>Kimberly-Clark Corporation, Atlanta, Georgia; and <sup>3</sup>Departments of Chemical and Biomolecular Engineering, and Materials Science and Engineering, Johns Hopkins University, Baltimore, Maryland

**ABSTRACT** The energetics and hydrogen bonding profiles of the helix-to-coil transition were found to be an additive property and to increase linearly with chain length, respectively, in alanine-rich  $\alpha$ -helical peptides. A model system of polyalanine repeats was used to establish this hypothesis for the energetic trends and hydrogen bonding profiles. Numerical measurements of a synthesized polypeptide Ac-Y(AEAAKA)<sub>k</sub>F-NH<sub>2</sub> and a natural  $\alpha$ -helical peptide a2N (1–17) provide evidence of the hypothesis's generality. Adaptive steered molecular dynamics was employed to investigate the mechanical unfolding of all of these alanine-rich polypeptides. We found that the helix-to-coil transition is primarily dependent on the breaking of the intramolecular backbone hydrogen bonds and independent of specific side-chain interactions and chain length. The mechanical unfolding of the  $\alpha$ -helical peptides results in a turnover mechanism in which a 3<sub>10</sub>-helical structure forms during the unfolding, remaining at a near constant population and thereby maintaining additivity in the free energy. The intermediate partially unfolded structures exhibited polyproline II helical structure as previously seen by others. In summary, we found that the average force required to pull alanine-rich  $\alpha$ -helical peptides in between the endpoints—namely the native structure and free coil—is nearly independent of the length or the specific primary structure.

**SIGNIFICANCE** We found that the force required to pull an  $\alpha$ -helix apart is approximately constant regardless of the degree to which it has already been unfolded or the initial length of the helix. This additive property was determined through adaptive steered molecular dynamics simulations of several alanine-rich peptides with varying sequence and length. The helices were also found to retain partial helical character commensurate with their retained free energy at a given extension. These results provide a sharper view of the stability of the  $\alpha$ -helix in proteins. They also have strong implications for the folding and unfolding pathways involving this secondary structure in proteins generally.

## INTRODUCTION

The  $\alpha$ -helix is one of the most fundamental secondary structures found in proteins. Among other things, it helps the formation of tertiary structure and often plays a role in a protein's function. The allowed combinations of  $\phi$  and  $\psi$  angles in an  $\alpha$ -helix naturally orient NH and CO groups along the backbone toward each other so as to form hydrogen bonds (1). However, the helix-coil transition is often not a simple two-state reaction. The protein's landscape can exhibit broad basins with folded and unfolded regimes (2), which confuses the identity of the initial and final structures. A given folding or unfolding protein will thus traverse across several minima and barriers along its pathway. The

intermediate (local minimal energy) structures can be quite different from the fully folded or unfolded structures. The compact substructures with frayed ends (3) have been seen to appear along the pathway, for example. The complexity of the landscape plays a role in the Zimm-Bragg (4) and Lifson-Roig (5) theories of the energetics of the transition (6). Meanwhile, the development of sensitive experimental techniques, such as atomic force microscopy and optical tweezers, enables measurements of the conformational change of a single macromolecule (7). These techniques also provide the force required to mechanically unfold a protein, RNA, or DNA (8,9). Steered molecular dynamics (SMD) is carried out in molecular dynamics (MD) simulations to obtain the corresponding unbinding potentials (10,11) and a prediction of the atomic-level-detailed mechanism (12–14). In this work, adaptive steered molecular dynamics (ASMD) (15) is used to reveal the energetic trends of the unfolding of a model system such as the

Submitted October 30, 2020, and accepted for publication March 18, 2021.

\*Correspondence: r.hernandez@jhu.edu

Editor: Jianhan Chen.

<https://doi.org/10.1016/j.bpj.2021.03.017>

© 2021 Biophysical Society.

This is an open access article under the CC BY-NC-ND license (<http://creativecommons.org/licenses/by-nc-nd/4.0/>).

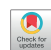

helix-coil transition for a series of polyalanines with increasing length, a series of water-soluble alanine-rich proteins with increasing length, and a biologically relevant structure. ASMD is an enhanced sampling method similar to SMD but is performed in several stages to avoid the spread of work that can limit the applicability of SMD. ASMD has been successfully applied to reveal the energetics of decaalanine in vacuum and implicit and explicit solvents (16–18), neuropeptide Y (15,19), and  $\beta$ -hairpin-containing peptides (20,21). Here, we consider a class of successively larger—that is, longer—helical peptides whose potential of mean force (PMF) profiles can be revealed by ASMD so as to establish the trends in the forces and structure associated with the stretching of a helix as a function of their length.

Polyalanine- and alanine-based peptides have already been used as model systems to address the helix-coil transition both experimentally (22–24) and theoretically (25). Alanine, with the highest propensity for helical formation (26), has only a methyl group as its side chain. Alanine-rich peptides are a suitable target for addressing the helix-coil transition because of their high tendency for helix formation and in consideration of reducing the computational cost in the simulations. Moreover, the kinetics of the helix-coil transition of alanine-rich peptides has been seen to be sensitive to temperature (24) and peptide length (27,28). Such kinetics are also sensitive to the structure in the initial unfolded proteins; during the process of the helix-coil transition, helices tend to form faster when there is more similarity between the initial coil conformations and the helical structures in the folded state (29). One caveat associated with our choice to focus on polyalanine peptides is that they are insoluble in water. Thus, the determination of the stretching of polyalanine relies on the constraint that it has been submerged in water either by holding both ends therein or because it is part of a larger soluble protein. There has been much debate over which is the stable conformation of polyalanine peptides in solvent,  $\alpha$ -helix or random coil. For short alanine-based peptides, both  $\alpha$ -helical and  $3_{10}$ -helical conformations have been observed experimentally (30). Advances in the accuracy of model force fields have led to increasingly better model predictions (31–36). At low temperatures, the Ala<sub>21</sub> peptide was seen to exhibit polypyrrolidone II (pPPII) helical structure in simulations using the AMBER force field (37). The stable structure in Ala<sub>12</sub> was found to be a random coil in simulations with the CHARMM force field (38). However, Wales et al. found that increasing the amount of alanine residues from 12 to 16 increases the stability of the  $\alpha$ -helical structure in simulations using the AMBER95 force field (39). There is also evidence that suggests that the propensities of the relative orientation of the residues in alanine-rich peptides are highly sensitive to the solvent environment (24,40). To avoid such a confounding factor, in this work we restrict the nature of the solvent environment to be neat water in all cases.

To confirm the role of the trends in helical proteins with their increasing length that we found in polypeptides forced to be in a water solvent, we selected two additional alanine-rich peptides that are known to be soluble. The first peptide of interest is Ac-Y(AEAAKA)<sub>k</sub>F-NH<sub>2</sub> (EK peptide) (41–45). The EK polypeptide exhibits a single  $\alpha$ -helical structure for several repeats from  $k = 4$ –8 that is, at least, partly a consequence of the helix-stabilizing alanines (39,46), salt-bridge formations, and low temperatures. The series of EK polypeptides are characterized at a temperature of 300 K, at which they are known to be 60% soluble in water (42). The second soluble peptide is the a2N (1–17) (Protein Data Bank, PDB: 2LX4 (47)) peptide with the  $\alpha$ -helical structure from *Mus musculus* V-ATPase. The a2N (1–17) fragment regulates the enzymatic exchange of GDP/GTP of cytohesin-2 (47). It is composed of 17 amino acids including only one alanine residue (sequence: MGSFLRSESMCLAQLFL), and residues 5–17 form an  $\alpha$ -helix, whereas residues one to four form a flexible N-terminus (47). Finally, it is notable that  $\Delta H_{\text{formation}}$  for the helix-coil transition was found to be  $\sim 1$  kcal/mol for a large family of helices of lengths ranging from 12 to 19 residues through calorimetry experiments (42,48). Other calorimetry experiments utilizing poly-L-glutamic acid repeats demonstrated that the  $\Delta H_{\text{formation}}$  was also  $\sim 1$  kcal/mol (49). These results indicate that the transition is independent of chain length and type of residues when the peptides are free, in agreement with our findings for the pulling of the proteins when their ends are constrained.

In this work, we determined the energetics and pathway of the force-induced unfolding process for several polypeptides with varying amino acid sequences. The results reveal the generality of the  $\alpha$ -helix folding process in leading to corresponding PMFs and hydrogen bonding profiles across different proteins. Our benchmark systems are a series of polyalanine peptides, ranging from 6 to 50 residues in length. We compare the PMF and the hydrogen bonding profiles obtained from the model system to the alanine-rich  $\alpha$ -helices and the biologically relevant  $\alpha$ -helix structure. The comparison among different alanine-rich peptides demonstrates that the PMF profiles correspond to one another by following the same shape. Furthermore, the hydrogen bonding profiles exhibit the same trends for all types of hydrogen bonds that were observed. Those similarities indicate that the unfolding mechanism for the  $\alpha$ -helix is the same for both the model polyalanine peptides and the alanine-rich polypeptides and independent of the side-chain interactions.

## METHODS

### Review of ASMD theory

ASMD has previously been benchmarked on neuropeptide Y in explicit solvent and decaalanine in vacuum and implicit and explicit solvents (15–18).

Our group found that fewer trajectories were required for convergence in comparison with those needed using SMD (10,11). For more details on the criteria required for convergence, please refer to the recent review in (50).

In SMD, a steering force is applied on an auxiliary atom, which is attached to the system of interest with a harmonic potential to guide it along a chosen reaction coordinate or path. A series of nonequilibrium trajectories are then generated and averaged through the Jarzynski equality (JE),

$$G(\xi_t) = G(\xi_0) - \frac{1}{\beta} \ln \langle e^{-\beta W_{\xi_t \leftarrow \xi_0}} \rangle_0, \quad (1)$$

which relates the nonequilibrium work values with the equilibrium free energy difference between two states (51–53). In the JE,  $G$  represents the PMF obtained at a particular extension of the reaction coordinate. The constant  $\beta$  is  $1/k_B T$ , where  $k_B$  is the Boltzmann constant and  $T$  is the temperature. The SMD method has successfully enabled investigations of energetic changes along pathways that are hard to access within the regular timescales of MD simulations, such as protein folding (54) and protein-ligand interactions (55). Even though the combination of SMD and JE has been a powerful tool for computing the PMF of a system, its implementation is often challenging because the requirement of exponential-Boltzmann-weighted calculation requires a large number of simulations to acquire the convergence.

ASMD was developed by Hernandez and co-workers (15–17) to reduce the sampling size in SMD simulations. The central idea of the method is the segmentation of the whole reaction coordinate into several stages (15). At each stage, a standard SMD simulation is performed, and the PMF is determined using the JE (51–53). The PMFs are sewn together between stages using a criterion to contract the ensemble at the end of a given stage into one that better approximates the equilibrium ensemble so as to initiate the subsequent stage. In the naïve ASMD method employed throughout this work, we use the simplest such contraction. That is, the trajectory that has the work value closest to the Jarzynski average value at the end of a stage is used as the starting configuration for the next stage. By selecting only one important configuration at the end of each stage, the trajectories that contribute very little to the overall PMF are eliminated, thereby saving computing resources that are otherwise used to propagate trajectories that contribute little to the nonequilibrium ensemble averages. In summary, the PMF for the particle pulled from  $r_{\text{ec}}(0)$  to the position  $r_{\text{ec}}(t)$  at a given  $t \in (t_{j-1}, t_j]$  is obtained iteratively through the corresponding  $j$  stages as

$$\overline{W}(r_{\text{ec}}(t)) = \overline{W}(r_{\text{ec}}(t_{j-1})) - \beta^{-1} \ln \left\{ \frac{1}{N} \sum_{i=1}^N e^{-\beta W_j(\xi_t^{(i)})} \right\}, \quad (2)$$

where  $r_{\text{ec}}(t_{j-1})$  is the position of the auxiliary particle at the end of the stage  $j-1$  and the nonequilibrium work  $W_j$  is obtained for each of the  $N$  trajectories  $\xi_t^{(i)}$ , labeled by  $i$ , in the  $j^{\text{th}}$  stage. The naïve ASMD method has proven to be efficient and accurate (15,16) for such averages when they are dominated by a single predominant pathway and therefore suffices for the application to polyanalines in this work. Because other versions—e.g., fixed-relaxation ASMD (18) and multibranching ASMD (56)—are not used in this study, we will refer to the naïve method simply as ASMD in the remainder of this work.

## Equilibration of target peptides

### Polyalanine peptides

Ala homopolymers with lengths 6, 10, 14, 22, 30, 38, and 50 residues were used to represent the family of such single-domain helical peptides.

Each structure was built using the VMD plugin molefacture (57). The N-terminus and C-terminus of all the peptides were neutralized using the usual capping procedure—that is, they were acetylated and amidated, respectively. Each helical structure was rotated to the  $z$  axis and then placed into a TIP3P water box long enough to accommodate the fully extended peptide, and wide enough to accommodate the initial structure. All simulations were performed with NAMD (58) and the CHARMM36 force field (32). The importance of the torsion-energy terms in leading to a proper description of protein has been reported earlier (35,59–61). Compared with the CHARMM22 force field, the CHARMM36 force field employed here optimizes the  $\phi$  and  $\psi$  dihedral in interaction energies through the CMAP correction terms (32,62). We did not make explicit comparison to other force fields such as those in the AMBER suite because there have been several reports suggesting that they lead to comparable results (63,64). The caveat to this claim is that one must use a force field appropriate to the structures sampled by the particular system (65). Thus, the choice of CHARMM36 is motivated by its benchmarked treatment of the dihedral angles as needed for the appropriate treatment of the  $\alpha$ -helical polypeptides of interest in this work.

The whole system was initially equilibrated for 1 ns under  $NPT$  conditions at 300 K with the damping coefficient set as  $5 \text{ ps}^{-1}$ . The pressure was regulated using a Nosé-Hoover Langevin piston with a decay period of 100 fs and a damping time constant of 50 fs. During the  $NPT$  equilibration, the  $C_\alpha$  ends of each peptide were constrained to allow the water to reach the appropriate density. The system was then equilibrated under  $NVT$  conditions at 300 K. A series of 200 ps relaxations were performed with the backbone constrained, using a harmonic potential decreasing from 10.0 to 5.0 to 1.0 kcal/mol  $\text{\AA}^2$ . The peptide was then allowed to freely equilibrate under  $NVT$  conditions for 1 ns. At the end of that equilibration, the peptide ends are no longer on the  $z$  axis. The whole system could then be returned to the  $z$  axis through a rotation and translation of the periodic box. We found it easier, however, to rotate and translate only the protein structure to align its ends to the  $z$  axis and then resolute it with TIP3P water. In the end, the system was again equilibrated under  $NPT$  conditions for 1 ns at 300 K with the ends constrained. Equilibration was verified through the plateau in the root mean-square deviation analysis obtained via the NAMD plugin.

### EK peptides

A soluble polyaniline-rich repeat Ac-Y(AEAAKA) $_k$ F-NH $_2$  (EK peptide), where  $k$  is equal to 4, 5, 6, and 8 corresponding to 26, 32, 38, and 50 residues, respectively, has been observed experimentally to be at least 60% soluble in water at 300 K (42). Each experimentally relevant structure was built using VMD plugin molefacture (57). The same end caps and equilibration protocol that were used in the polyaniline study were used in the water-soluble structure study. The resulting structures for all values of  $k$  were  $\alpha$ -helical.

### A2N peptide

A biologically related  $\alpha$ -helical structure, a2N (1–17) from *M. musculus* V-ATPase (PDB: 2LX4 (47)), is also used to determine the PMF and hydrogen bonding profiles. The structure is composed of 17 amino acids including only one alanine residue (sequence: MGSLFRSESMCLAQLFL). Amino acids 5–17 form an  $\alpha$ -helix, whereas amino acids 1–4 form a flexible N-terminus (47). The same end caps and equilibration protocol that were used for both polyaniline peptides and EK peptides were used for equilibration in this study.

## ASMD simulation parameters for unfolding

The ASMD simulations for the above peptides were carried out in the explicit solvent under  $NPT$  conditions at 300 K with NAMD (58) and the CHARMM36 force field (32). For each system, the ASMD simulation was started with the same configuration that was saved from the

equilibration phase. Each polypeptide was placed in a rectangular TIP3P water box that was slightly bigger than the corresponding unfolded protein. The first residue C<sub>α</sub>-terminus was held fixed, and the other C<sub>α</sub>-terminus was attached with the pseudoatom, which would be pulled with an applied force along the *z* axis direction. Each protein was pulled to a total distance equal to 2 Å times the number of residues, as that is sufficient to break all the intrapeptide bonds (66–68). The pulling velocity was set to 1 Å/ns because that was slow enough to obtain convergence in the PMF. The parameters are summarized in Table 1. Within each stage, 100 traditional SMD trajectories are carried out, and 100 frames were recorded per trajectory. The conditions for the convergence of the method were recently reported (50), and the convergence of the PMFs in these cases is reported in Fig. S1. Stretching the protein 2 Å per residue results in an unfolded protein, but not necessarily a linear amino acid sequence.

## Hydrogen bonding

The hydrogen bonding profiles were calculated for each of the alanine-rich peptides throughout each trajectory. The number of hydrogen bonds was obtained using the MDAnalysis (69,70), and a cutoff of 4 Å between two electronegative atoms and an angle of 140° with the H atom as the vertex were used. The average number of hydrogen bonds along the pulling process,

$$\langle N(S_1, S_2) \rangle_t = \frac{\sum_{i=1}^N \widehat{N}(S_1, S_2) e^{-\beta W_j(\xi_t^{(i)})}}{\sum_{i=1}^N e^{-\beta W_j(\xi_t^{(i)})}}, \quad (3)$$

was determined by weighting the instantaneous number of hydrogen bonds  $\widehat{N}(S_1, S_2)$  with the corresponding instantaneous work following the notation used earlier in Eq. 2 (8,16,71). The instantaneous number of hydrogen bonds between two selected sets, *S*<sub>1</sub> and *S*<sub>2</sub>, of functional units—viz. particular residues of the protein or adjacent water molecules—is

$$\widehat{N}(S_1, S_2) = \sum_{\zeta_k \in S_1, \zeta_l \in S_2} \widehat{n}(\zeta^{(k)}, \zeta^{(l)}), \quad (4)$$

where  $\widehat{n}(\zeta^{(k)}, \zeta^{(l)})$  is the number of hydrogen bonds (1 for allowed positions and 0 otherwise) between the two functional units, the prime in the sum excludes the case that *k* = *l*, and the sum includes all possible units in each set. The form of Eq. 3 can be used to determine other average observables, such as the α-helical character, 3<sub>10</sub>-helical character, and π-helical character.

**TABLE 1 Summary of ASMD simulation parameters for the alanine-rich peptides**

| Peptide    | Length of reaction coordinate (Å) | Number of stages |
|------------|-----------------------------------|------------------|
| Ala6       | 12                                | 5                |
| Ala10      | 20                                | 10               |
| Ala14      | 28                                | 10               |
| Ala22      | 44                                | 20               |
| Ala30      | 60                                | 25               |
| Ala38      | 76                                | 25               |
| Ala50      | 100                               | 50               |
| EK (k = 4) | 52                                | 25               |
| EK (k = 5) | 64                                | 25               |
| EK (k = 6) | 76                                | 25               |
| EK (k = 8) | 100                               | 50               |
| a2N (1–17) | 34                                | 10               |

## RESULTS AND DISCUSSION

Seven polyalanine peptides were stretched to determine the degree of additivity in the energy and the helix-coil transition as the protein is unfolded. The PMF profiles for a series of polyalanine peptides are shown in Fig. 1. The PMF profiles for a few additional peptides that are known to be soluble in water are also shown in Fig. 2. The PMF profiles for all of these α-helices follow the same trend. The wells seen at the beginning of the stretch for each curve represent the structure with the minimal energy. Starting with the initial compact (helical) structure, the PMF increases approximately linearly with increasing extension along a distance associated with the transition from helix to coil. The pulling force was determined as 0.68 kcal/mol Å (= 47.26 pN), which is comparable to that found in atomic force microscopy measurements of the unfolding poly(γ-benzyl-L-glutamate) in dioxane (72). This agreement may seem surprising because both the solvent environments and sequences of α-helices are different between the two systems. However, both polyalanines and poly(γ-benzyl-L-glutamate) have an α-helical backbone in common, and the unwinding of their α-helical structure appears to present the dominant contribution. That is, because the α-helix is the stabilizing structure in the solvent (46), the extension of the longer α-helix requires the most work. Coronado and co-workers (73) applied the approximate model of Buhot and Halperin (74,75) to determine the force value from the elongation parameters (*s*) in the Zimm-Bragg model. With the typical values of *s* at 1.1–1.5 (28), the force values should be around 0.45 kcal/mol Å (73), which is close to those found here (0.68 kcal/mol Å). Furthermore, because the helix-coil transition includes the process of breaking the backbone hydrogen bonds and the formation of peptide-water hydrogen bonds, the PMF is expected to be lower

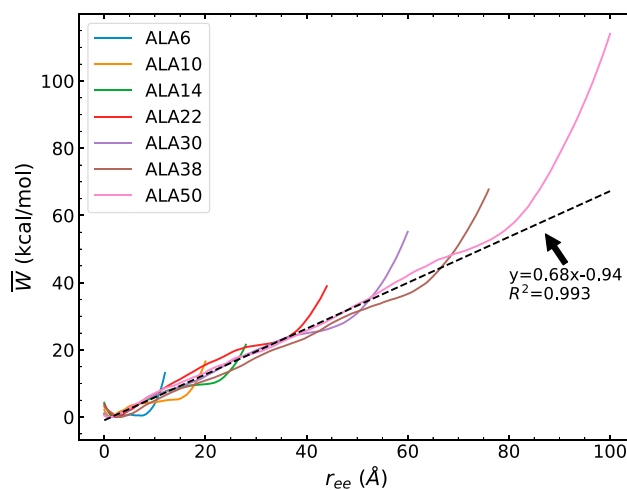

**FIGURE 1** Comparison of the energetics of several polyalanine peptides. The PMFs have been obtained using 100 tps at 1 Å/ns. To see this figure in color, go online.

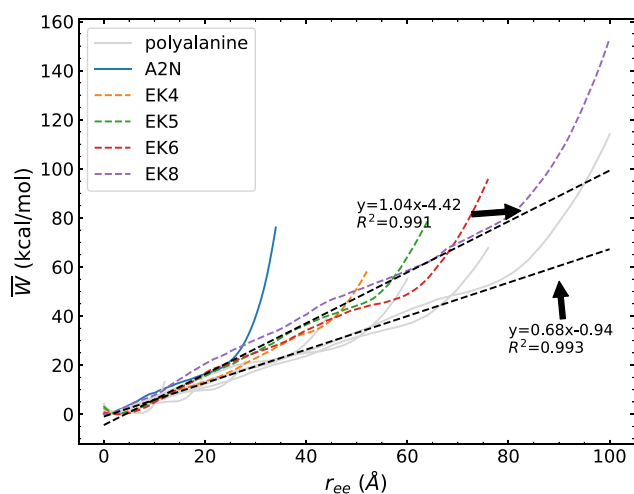

FIGURE 2 Comparison of the energetics of several polyalanine peptides, EK peptides, and a2N (1–17) peptide. The PMFs have been obtained using 100 tps at 1 Å/ns. To see this figure in color, go online.

than that for the unfolding of polypeptides in vacuum (data not shown).

The PMFs for the EK peptides follow the trend seen for the polyalanines in that they share the same slope. The similarity in the required force indicates that the energetics of these  $\alpha$ -helices are determined by the same intramolecular interactions, which is hydrogen bonding. The small deviations between the slopes of these two families of proteins may be due to the energy arising from the side-chain interactions between the charged side chains (e.g., Glu and Lys) within EK peptides. Moreover, the large side chain of Lys would also shield water molecules from the backbone, making the EK peptide prefer adopting the  $\alpha$ -helix structure (43,76,77). As a consequence, the shielding effect with the salt-bridge formation lets EK peptides have larger final work values than their corresponding polyalanine peptides with similar lengths. As discussed in the next paragraph, this conclusion is also supported by hydrogen bond profiles shown in Figs. 4 and 5. After all the intrapeptide bonds are broken, further stretching of the peptides causes the PMF to increase dramatically, which is due to the covalent bonds

stretching. Because we only pull the peptide 2 Å per residue, some peptides may be pulled farther than others. In such a case, the final work will increase to different extents with different degrees of full extension. The a2N (1–17) structure still has a very similar PMF profile as compared to the model system, even though it could have van der Waals interactions in the helix formed between side chains. The a2N (1–17) peptide also has a slope closer to the EK peptide family. Because a2N (1–17) has a completely different sequence with only one alanine residue from the EK peptides, it again illustrates that the precise identity of residues has little influence on helix-coil transition. These conclusions are also apparent in the relative structures of the peptides shown in Fig. 3 along their extension. The helices appear to unfold from their ends and proceed to unfold in a cooperative manner. Both pairs of comparable peptides—viz. (a2N and Ala<sub>14</sub>) and (EK and Ala<sub>30</sub>)—have a similar degree of unwinding of the helices along the pulling coordinate in agreement with an apparent nonspecificity in the intrapeptide contacts.

For the hydrogen bonding profiles (Figs. 4 and 5), all curves are the weighted averages of 100 trajectories per stage (tps) calculated by Eqs. 3 and 4. The hydrogen bond observables are shown along the end-to-end distance in Fig. 4 (in correspondence to the PMFs of Fig. 1) for clarity. The top panel displays the number of intrapeptide hydrogen bonds along the stretching path. Because some peptide-water hydrogen bonds are already formed before the unfolding process starts, the bottom panel is shown as the number of peptide-water hydrogen bonds that are newly formed under the course of unfolding. It is clear that the addition of the helical turn increases the initial number of both intrapeptide and peptide-water hydrogen bonds. As the peptide uncoils, the intrapeptide hydrogen bonds start to be broken, and they are replaced with peptide-water hydrogen bonds. During the unfolding event, each peptide exhibits a similar trend in both the increase of the number of peptide-water hydrogen bonds and the decrease of the number of intrapeptide hydrogen bonds. There are some differences in the number of peptide-water hydrogen bonds between EK peptides with  $k = 6$  (at 100 Å) and 8 (at 120 Å) and the

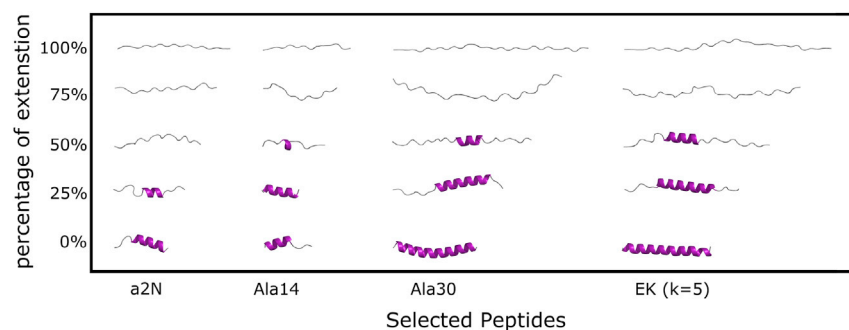

FIGURE 3 Comparison of structures along the representative ASMD trajectories at several points along the relative extension of the peptides from initial (folded) to final (fully unfolded) structures. The a2N and Ala<sub>14</sub> peptides initially have three turns and approximately the same number of residues equal to 17 and 14, respectively. The EK ( $k = 5$ ) and Ala<sub>30</sub> peptides initially have eight turns and approximately the same number of residues equal to 32 and 30, respectively. To see this figure in color, go online.

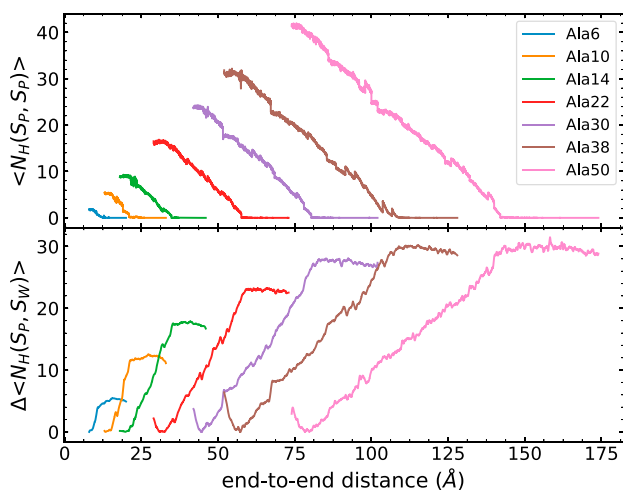

FIGURE 4 Polyalanine lengths and the corresponding total bonding profile of 100 trajectories at 1 Å/ns. The top panel corresponds to the intrapeptide hydrogen bonds, and the bottom panel corresponds to the peptide-water hydrogen bonds. The rate of losing intrapeptide hydrogen bonds is approximately the same for each polyalanine length. To see this figure in color, go online.

corresponding polyalanine peptides with similar lengths. Some minor discrepancies are caused by the discontinuities that can arise from the connection criteria in ASMD between stages. The selection of only one representative configuration at the end of each stage can lead to instantaneous and abrupt changes in the average number of hydrogen bonds at the transition between stages, but those

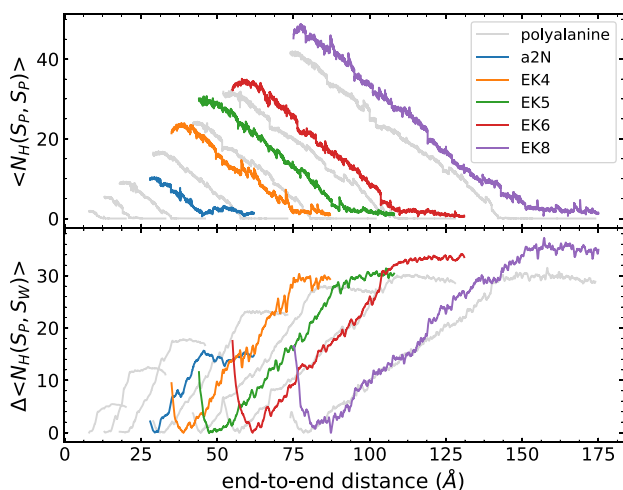

FIGURE 5 Various alanine-rich  $\alpha$ -helices and the corresponding total bonding profile of 100 trajectories at 1 Å/ns. The top panel corresponds to the intrapeptide hydrogen bonds, and the bottom panel corresponds to the peptide-water hydrogen bonds. The gray color corresponds to the results of polyalanine peptides, which have been shown in Fig. 4. The numbers of peptide-water hydrogen bonds for the EK peptides and a2N (1–17) peptides are higher than the polyalanine peptides because of the hydrophilic side chains. The rate of losing intrapeptide hydrogen bonds is still approximately the same for each type of peptide. To see this figure in color, go online.

abrupt changes relax quickly thereafter. The number of hydrogen bonds in the EK peptides also shows additional fluctuations beyond that, but those fluctuations are small compared to the overall magnitudes of the number of hydrogen bonds. The rate of the replacement of peptide-water hydrogen bonds—vis-à-vis the slopes in the curves in the bottom panel of Figs. 4 and 5—decreases with the length of peptides. Consequently, the replacement may relate to the kinetics of peptide unfolding and their association with the surrounding water molecules. A key observation is that the rates—along with their decreasing behavior—between the polyalanine peptides and soluble peptides match as their lengths increase. It is also notable that the soluble peptides reach a higher total number of intrapeptide hydrogen bonds than the corresponding polyalanine peptides with similar lengths. The extra intrapeptide hydrogen bonds are due to those formed between the hydrophilic side chains and the main-chain backbones.

In Figs. 6 and 7, three types of intrapeptide hydrogen bonds formed within the main-chain are classified ( $3_{10}$ -helix (*top*),  $\alpha$ -helix (*middle*), and  $\pi$ -helix (*bottom*)). Most intrabackbone hydrogen bonds are formed as  $i \rightarrow i + 4$  bonds ( $\alpha$ -helix), and they are lost at the same rate throughout both polyalanine and soluble peptides. The slope is determined as  $-0.63$  H bond/Å. Combined with the slope from the PMF profile, the energy for losing each helical structure is  $\sim 1.08$  kcal/mol. According to the free energy surface from the work of Margulis and Berne (78), the transition from the folded to unfolded state for Ala<sub>5</sub> requires  $\sim 1$ –2 kcal/mol, in agreement with our findings. Moreover, at the pulling speed of 1 Å/ns, the rate of losing the intrapeptide  $\alpha$ -helical hydrogen bond

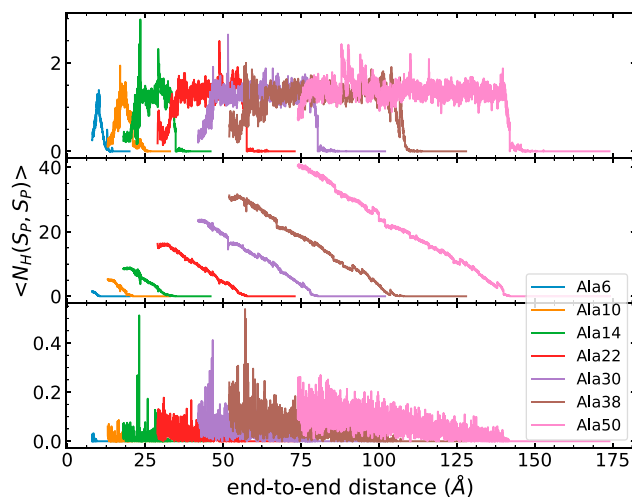

FIGURE 6 Various alanine-rich  $\alpha$ -helices and the corresponding intrapeptide  $3_{10}$ -helical (*top*),  $\alpha$ -helical (*middle*), and  $\pi$ -helical (*bottom*) bonding profiles of 100 trajectories at 1 Å/ns. Most of the hydrogen bonds are formed as  $i \rightarrow i + 4$ , and the rate of losing  $\alpha$ -hydrogen bonds is about the same, which is determined to be  $-0.63$  H bond/Å. To see this figure in color, go online.

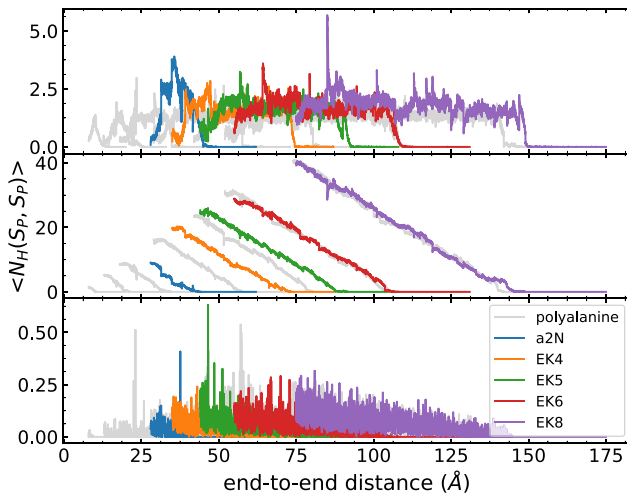

FIGURE 7 Various alanine-rich  $\alpha$ -helices and the corresponding intrapeptide  $3_{10}$ -helical (top),  $\alpha$ -helical (middle), and  $\pi$ -helical (bottom) bonding profiles of 100 trajectories at 1  $\text{\AA}/\text{ns}$ . The gray color corresponds to the results of polyalanine peptides, which have been shown in Fig. 6. Most of the hydrogen bonds are still formed as  $i \rightarrow i + 4$ , and the rate of losing  $\alpha$ -hydrogen bonds is also about the same. To see this figure in color, go online.

was determined to be 0.63 per ns. Therefore, the rate of losing a single helical turn was roughly  $6 \times 10^8 \text{ s}^{-1}$ , which is in close agreement with previous reports (28,79,80). There is almost no formation of  $i \rightarrow i + 5$  ( $\pi$ -helix) bonds. The curves for the  $i \rightarrow i + 3$  bonds ( $3_{10}$ -helix) reach a maximal number of one to two contacts during most of the unfolding. Furthermore, at the beginning of unfolding, the number of  $3_{10}$ -helical contacts increases by  $\sim 1$  contact. Thereafter,  $3_{10}$ -helical contacts continue to be broken and reformed while maintaining a roughly steady number of only one such contact until other contacts are broken when the protein reaches a random coil structure. That is to say,  $3_{10}$ -helical contacts are involved in the intermediates of the unfolding process, as suggested by other studies (81–83). As we have described thus far, the peptides begin in  $\alpha$ -helical structure, and end in random coils. In between, the peptides also adopt increasing pPII helical structures, which polyalanines are well known to adopt. Notably, the pPII helix structures are not released immediately upon partial unfolding, as indicated in Figs. S2 and S3. Ramachandran plots recording the angles traversed along the unfolding path of each of the peptides reported here are available in Figs. S4 and S5. The most frequently visited angles—corresponding to particular helical structures—are in agreement with the most energetically favorable structures reported in the Ramachandran plots of MacKerell and co-workers (32). Even though all of these simulated peptides have various lengths and sequences, they all share the same corresponding trend during the course of unfolding. In other words, the helix-coil transition for a large number of alanine-rich proteins does not appear to depend

on the specific repeat units nor the length of peptides. Based on the behavior exhibited in  $3_{10}$ -helix contacts and  $\alpha$ -helix contacts, the proposed mechanism of the helix-coil transition arises from the accumulation of steps in which the contacts from  $\alpha$ -helical turns are successively—viz. cooperatively—lost from a single remaining helical subdomain and turn into pPII helix or fully random coils.

## CONCLUSION

The main result of this work is the apparent additivity in the unfolding free energy of alanine-rich domains with the number of residues. In particular, we found that the energetics of unfolding polyalanine peptides in an explicit water solvent is additive across a series of such peptides with varying length. In each case, the addition of a helical turn increases the energetic contribution to the PMF, but it does not break the near-linear behavior between free energy and stretching distance. The linear relationship can be summarized by an estimate for the average force per distance required to stretch polyalanines. The additivity in the energetics and the value of this factor was also found in alanine-rich peptides—viz. the EK polypeptide—and even in a peptide, a2N, that contains only one alanine residue. Indeed, the shape of the PMF was similar for all of the polypeptides considered here.

The ASMD method applied in this work improves the overall efficiency of the calculations compared to the standard SMD simulations. For unfolding Ala<sub>10</sub> peptide in vacuum, SMD needs 10,000 trajectories with 10  $\text{\AA}/\text{ns}$  pulling speed to obtain converged results (16). However, we had earlier shown that we can achieve similar convergence using ASMD with 100 tps at 10  $\text{\AA}/\text{ns}$  speed for Ala<sub>10</sub>. Here, we found that a slower pulling speed of 1  $\text{\AA}/\text{ns}$  is required for ASMD to obtain convergence of larger peptides with up to 50 residues. Such a reduction in speed in concert with a large number of tps would make its determination by SMD significantly more expensive and out of reach for most, if not all, present-day computers. Thus, the ASMD method was essential for these calculations and can be a practical tool for studies of larger peptides.

The hydrogen bond profiles along all of these stretching simulations were also observed and led to the finding that the mechanisms of unfolding displayed correspondence between the various alanine-rich  $\alpha$ -helices with increasing chain lengths in concert with the additivity in the free energy. That is, the hydrogen bonding profiles exhibited corresponding slopes across the polyalanines, the EK polypeptides, and the a2N peptide. We found that the hydrogen bonding of each polypeptide is mainly composed of  $\alpha$ -helical contacts, which are broken at a nearly constant rate in a constant velocity pull. Thus, the corresponding H-bond profiles suggest that the mechanism of the single-molecule pulling is the same for each of the  $\alpha$ -helices that were examined in our simulation.

Based on our findings, the helix-to-coil transition of alanine-rich peptides appears to rely primarily on the breaking of the backbone hydrogen bonds rather than from contributions of any side-chain interactions or chain length. During the unfolding, as one  $\alpha$ -helical contact is lost with the rest of the  $\alpha$ -helical contacts intact, it turns into a  $3_{10}$ -helical contact and then to a pPII helix or a coil through to the end. We have not investigated the energy of hydrogen bonds directly here. It has been reported that the energies of backbone hydrogen bonds within membrane proteins are not sensitive to the local concentration of water changes (84), and other studies also demonstrated that the nature of the solvent could affect the strength of the intramolecular interactions (72,85). Furthermore, the polarity of the residues within the peptide sequence would affect the interactions between the main-chain backbone and water molecules, which, in turn, would influence the tendency of helix formation (82,86). Thus, the direct impacts of the types of solvents and their local concentrations around the peptide backbones on the hydration of peptides with various lengths, as well as on the helix-coil transition, have been seen to be significant, but they remain to be fully resolved.

## SUPPORTING MATERIAL

Supporting material can be found online at <https://doi.org/10.1016/j.bpj.2021.03.017>.

## AUTHOR CONTRIBUTIONS

R.H. and S.Q. designed research, developed methods, analyzed results, and edited the manuscript. Y.Z. and H.R.B. performed research, developed methods, analyzed data, and wrote the manuscript. C.L. and R.B. performed research.

## ACKNOWLEDGMENTS

This work has been partially supported by the National Science Foundation through grant number CHE 1700749. The computing resources necessary for this research were provided in part by the National Science Foundation through XSEDE resources under grant number CTS090079 and by the Maryland Advanced Research Computing Center.

## REFERENCES

- Doig, A. J. 2002. Recent advances in helix-coil theory. *Biophys. Chem.* 101–102:281–293.
- Snow, C. D., E. J. Sorin, ..., V. S. Pande. 2005. How well can simulation predict protein folding kinetics and thermodynamics? *Annu. Rev. Biophys. Biomol. Struct.* 34:43–69.
- Chakrabarty, A., and R. L. Baldwin. 1995. Stability of  $\alpha$ -helices. *Adv. Protein Chem.* 46:141–176.
- Zimm, B. H., and J. K. Bragg. 1959. Theory of the phase transition between helix and random coil in polypeptide chains. *J. Chem. Phys.* 31:526–535.
- Lifson, S., and A. Roig. 1961. On the theory of helix-coil transition in polypeptides. *J. Chem. Phys.* 34:1963–1974.
- Poland, D., and H. A. Scheraga. 1970. *Theory of Helix-Coil Transitions in Biopolymers*. Academic Press, New York.
- Mehta, A. D., M. Rief, ..., R. M. Simmons. 1999. Single-molecule biomechanics with optical methods. *Science*. 283:1689–1695.
- Hummer, G., and A. Szabo. 2001. Free energy reconstruction from nonequilibrium single-molecule pulling experiments. *Proc. Natl. Acad. Sci. USA*. 98:3658–3661.
- Collin, D., F. Ritort, ..., C. Bustamante. 2005. Verification of the Crooks fluctuation theorem and recovery of RNA folding free energies. *Nature*. 437:231–234.
- Park, S., F. Khalili-Araghi, ..., K. Schulten. 2003. Free energy calculation from steered molecular dynamics simulations using Jarzynski's equality. *J. Chem. Phys.* 119:3559–3566.
- Park, S., and K. Schulten. 2004. Calculating potentials of mean force from steered molecular dynamics simulations. *J. Chem. Phys.* 120:5946–5961.
- Izrailev, S., S. Stepaniants, ..., K. Schulten. 1997. Molecular dynamics study of unbinding of the avidin-biotin complex. *Biophys. J.* 72:1568–1581.
- Ettig, R., N. Kepper, ..., K. Rippe. 2011. Dissecting DNA-histone interactions in the nucleosome by molecular dynamics simulations of DNA unwrapping. *Biophys. J.* 101:1999–2008.
- Moe, S. J., and A. Cembran. 2020. Mechanical unfolding of spectrin repeats induces water-molecule ordering. *Biophys. J.* 118:1076–1089.
- Ozer, G., E. F. Valeev, ..., R. Hernandez. 2010. Adaptive steered molecular dynamics of the long-distance unfolding of neuropeptide Y. *J. Chem. Theory Comput.* 6:3026–3038.
- Ozer, G., S. Quirk, and R. Hernandez. 2012. Adaptive steered molecular dynamics: validation of the selection criterion and benchmarking energetics in vacuum. *J. Chem. Phys.* 136:215104.
- Ozer, G., S. Quirk, and R. Hernandez. 2012. Thermodynamics of decaalanine stretching in water obtained by adaptive steered molecular dynamics simulations. *J. Chem. Theory Comput.* 8:4837–4844.
- Bureau, H. R., D. R. Merz, Jr., ..., R. Hernandez. 2015. Constrained unfolding of a helical peptide: implicit versus explicit solvents. *PLoS One*. 10:e0127034.
- Quirk, S., M. M. Hopkins, ..., D. L. Bain. 2018. Mutational analysis of neuropeptide Y reveals unusual thermal stability linked to higher-order self-association. *ACS Omega*. 3:2141–2154.
- Bureau, H. R., E. Hershkovits, ..., R. Hernandez. 2016. Determining the energetics of small  $\beta$ -sheet peptides using adaptive steered molecular dynamics. *J. Chem. Theory Comput.* 12:2028–2037.
- Bureau, H., S. Quirk, and R. Hernandez. 2020. The relative stability of trpzip1 and its mutants determined by computation and experiment. *RSC Advances*. 10:6520–6535.
- Miick, S. M., K. M. Casteel, and G. L. Millhauser. 1993. Experimental molecular dynamics of an alanine-based helical peptide determined by spin label electron spin resonance. *Biochemistry*. 32:8014–8021.
- Williams, S., T. P. Causgrove, ..., R. B. Dyer. 1996. Fast events in protein folding: helix melting and formation in a small peptide. *Biochemistry*. 35:691–697.
- Huang, C. Y., J. W. Klemke, ..., F. Gai. 2001. Temperature-dependent helix-coil transition of an alanine based peptide. *J. Am. Chem. Soc.* 123:9235–9238.
- Daggett, V., P. A. Kollman, and I. D. Kuntz. 1991. A molecular dynamics simulation of polyalanine: an analysis of equilibrium motions and helix-coil transitions. *Biopolymers*. 31:1115–1134.
- Pace, C. N., and J. M. Scholtz. 1998. A helix propensity scale based on experimental studies of peptides and proteins. *Biophys. J.* 75:422–427.
- Wang, T., Y. Zhu, ..., F. Gai. 2004. Length dependent helix-coil transition kinetics of nine alanine-based peptides. *J. Phys. Chem. B*. 108:15301–15310.
- Brooks, C. L. 1996. Helix-coil kinetics: folding time scales for helical peptides from a sequential kinetic model. *J. Phys. Chem.* 100:2546–2549.



29. Huang, C.-Y., Z. Getahun, ..., F. Gai. 2002. Helix formation via conformation diffusion search. *Proc. Natl. Acad. Sci. USA*. 99:2788–2793.
30. Miick, S. M., G. V. Martinez, ..., G. L. Millhauser. 1992. Short alanine-based peptides may form 3(10)-helices and not alpha-helices in aqueous solution. *Nature*. 359:653–655.
31. Best, R. B., and G. Hummer. 2009. Optimized molecular dynamics force fields applied to the helix-coil transition of polypeptides. *J. Phys. Chem. B*. 113:9004–9015.
32. Best, R. B., X. Zhu, ..., A. D. Mackerell, Jr. 2012. Optimization of the additive CHARMM all-atom protein force field targeting improved sampling of the backbone  $\phi$ ,  $\psi$  and side-chain  $\chi(1)$  and  $\chi(2)$  dihedral angles. *J. Chem. Theory Comput.* 8:3257–3273.
33. Raucci, R., G. Colonna, ..., S. Costantini. 2013. Peptide folding problem: a molecular dynamics study on polyalanines using different force fields. *Int. J. Pept. Res. Ther.* 19:117–123.
34. Zhou, C.-Y., F. Jiang, and Y.-D. Wu. 2015. Residue-specific force field based on protein coil library. RSFF2: modification of AMBER ff99SB. *J. Phys. Chem. B*. 119:1035–1047.
35. Smith, M. D., J. S. Rao, ..., L. Cruz. 2015. Force-field induced bias in the structure of AB21-30: a comparison of OPLS, AMBER, CHARMM, and GROMOS force fields. *J. Chem. Inf. Model.* 55:2587–2595.
36. Robustelli, P., S. Piana, and D. E. Shaw. 2018. Developing a molecular dynamics force field for both folded and disordered protein states. *Proc. Natl. Acad. Sci. USA*. 115:E4758–E4766.
37. Garcia, A. E. 2004. Characterization of non-alpha helical conformations in Ala peptides. *Polymer (Guildf.)*. 45:669–676.
38. Levy, Y., J. Jortner, and O. M. Becker. 2001. Solvent effects on the energy landscapes and folding kinetics of polyalanine. *Proc. Natl. Acad. Sci. USA*. 98:2188–2193.
39. Mortenson, P. N., D. A. Evans, and D. J. Wales. 2002. Energy landscapes of model polyalanines. *J. Chem. Phys.* 117:1363–1376.
40. Mukherjee, S., P. Chowdhury, and F. Gai. 2006. Tuning the cooperativity of the helix-coil transition by aqueous reverse micelles. *J. Phys. Chem. B*. 110:11615–11619.
41. Scholtz, J. M., H. Qian, ..., R. L. Baldwin. 1991. Parameters of helix-coil transition theory for alanine-based peptides of varying chain lengths in water. *Biopolymers*. 31:1463–1470.
42. Scholtz, J. M., S. Marqusee, ..., D. W. Bolen. 1991. Calorimetric determination of the enthalpy change for the  $\alpha$ -helix to coil transition of an alanine peptide in water. *Proc. Natl. Acad. Sci. USA*. 88:2854–2858.
43. Ghosh, T., S. Garde, and A. E. García. 2003. Role of backbone hydration and salt-bridge formation in stability of alpha-helix in solution. *Biophys. J.* 85:3187–3193.
44. Marqusee, S., and R. L. Baldwin. 1987. Helix stabilization by Glu...Lys+ salt bridges in short peptides of de novo design. *Proc. Natl. Acad. Sci. USA*. 84:8898–8902.
45. Scholtz, J. M., D. Barrick, ..., R. L. Baldwin. 1995. Urea unfolding of peptide helices as a model for interpreting protein unfolding. *Proc. Natl. Acad. Sci. USA*. 92:185–189.
46. Job, G. E., R. J. Kennedy, ..., D. S. Kemp. 2006. Temperature- and length-dependent energetics of formation for polyalanine helices in water: assignment of  $w(\text{Ala})(n,T)$  and temperature-dependent CD ellipticity standards. *J. Am. Chem. Soc.* 128:8227–8233.
47. Hosokawa, H., P. V. Dip, ..., V. Marshansky. 2013. The N termini of a-subunit isoforms are involved in signaling between vacuolar H<sup>+</sup>-ATPase (V-ATPase) and cytohesin-2. *J. Biol. Chem.* 288:5896–5913.
48. Lopez, M. M., D.-H. Chin, ..., G. I. Makhataдзе. 2002. The enthalpy of the alanine peptide helix measured by isothermal titration calorimetry using metal-binding to induce helix formation. *Proc. Natl. Acad. Sci. USA*. 99:1298–1302.
49. Rialdi, G., and J. Hermans, Jr. 1966. Calorimetric heat of the helix-coil transition of poly-L-glutamic acid. *J. Am. Chem. Soc.* 88:5719–5720.
50. Zhuang, Y., H. Bureau, ..., R. Hernandez. 2020. Adaptive steered molecular dynamics of biomolecules. *Mol. Sim* Published online August 20, 2020. <https://doi.org/10.1080/08927022.2020.1807542>.
51. Jarzynski, C. 1997. Equilibrium free-energy differences from nonequilibrium measurements: a master-equation approach. *Phys. Rev. E Stat. Phys. Plasmas Fluids Relat. Interdiscip. Topics*. 56:5018–5035.
52. Jarzynski, C. 1997. Nonequilibrium equality for free energy differences. *Phys. Rev. Lett.* 78:2690–2693.
53. Crooks, G. E. 1998. Nonequilibrium measurements of free energy differences for microscopically reversible Markovian systems. *J. Stat. Phys.* 90:1481–1487.
54. Lu, H., and K. Schulten. 1999. Steered molecular dynamics simulations of force-induced protein domain unfolding. *Proteins*. 35:453–463.
55. Patel, J. S., A. Berteotti, ..., A. Cavalli. 2014. Steered molecular dynamics simulations for studying protein-ligand interaction in cyclin-dependent kinase 5. *J. Chem. Inf. Model.* 54:470–480.
56. Ozer, G., T. Keyes, ..., R. Hernandez. 2014. Multiple branched adaptive steered molecular dynamics. *J. Chem. Phys.* 141:064101.
57. Humphrey, W., A. Dalke, and K. Schulten. 1996. VMD: visual molecular dynamics. *J. Mol. Graph.* 14:33–38, 27–28.
58. Phillips, J. C., R. Braun, ..., K. Schulten. 2005. Scalable molecular dynamics with NAMD. *J. Comput. Chem.* 26:1781–1802.
59. MacKerell, A. D., Jr., M. Feig, and C. L. Brooks, III. 2004. Improved treatment of the protein backbone in empirical force fields. *J. Am. Chem. Soc.* 126:698–699.
60. Hornak, V., R. Abel, ..., C. Simmerling. 2006. Comparison of multiple Amber force fields and development of improved protein backbone parameters. *Proteins*. 65:712–725.
61. Sakae, Y., and Y. Okamoto. 2013. Amino-acid-dependent main-chain torsion-energy terms for protein systems. *J. Chem. Phys.* 138:064103.
62. Best, R. B., J. Mittal, ..., A. D. MacKerell, Jr. 2012. Inclusion of many-body effects in the additive CHARMM protein CMAP potential results in enhanced cooperativity of  $\alpha$ -helix and  $\beta$ -hairpin formation. *Biophys. J.* 103:1045–1051.
63. Rueda, M., C. Ferrer-Costa, ..., M. Orozco. 2007. A consensus view of protein dynamics. *Proc. Natl. Acad. Sci. USA*. 104:796–801.
64. Maier, J. A., C. Martinez, ..., C. Simmerling. 2015. ff14SB: improving the accuracy of protein side chain and backbone parameters from ff99SB. *J. Chem. Theory Comput.* 11:3696–3713.
65. Piana, S., J. L. Klepeis, and D. E. Shaw. 2014. Assessing the accuracy of physical models used in protein-folding simulations: quantitative evidence from long molecular dynamics simulations. *Curr. Opin. Struct. Biol.* 24:98–105.
66. Ainaravaru, S. R., J. Brujic, ..., J. M. Fernandez. 2007. Contour length and refolding rate of a small protein controlled by engineered disulfide bonds. *Biophys. J.* 92:225–233.
67. Yang, G., C. Cecconi, ..., C. Bustamante. 2000. Solid-state synthesis and mechanical unfolding of polymers of T4 lysozyme. *Proc. Natl. Acad. Sci. USA*. 97:139–144.
68. Oesterhelt, F., D. Oesterhelt, ..., D. J. Müller. 2000. Unfolding pathways of individual bacteriorhodopsins. *Science*. 288:143–146.
69. Michaud-Agrawal, N., E. J. Denning, ..., O. Beckstein. 2011. MDAanalysis: a toolkit for the analysis of molecular dynamics simulations. *J. Comput. Chem.* 32:2319–2327.
70. Gowers, R. J., M. Linke, ..., O. Beckstein. 2016. MDAanalysis: a python package for the rapid analysis of molecular dynamics simulations. In *Proceedings of the 15th Python in Science Conference*. S. Benthall and S. Rostrup, eds, pp. 98–105.
71. Paramore, S., G. S. Ayton, and G. A. Voth. 2007. Extending the fluctuation theorem to describe reaction coordinates. *J. Chem. Phys.* 126:051102.
72. Sluysmans, D., N. Willet, ..., A.-S. Duwez. 2020. Single-molecule mechanical unfolding experiments reveal a critical length for the formation of  $\alpha$ -helices in peptides. *Nanoscale Horiz.* 5:671–678.
73. Zegarra, F. C., G. N. Peralta, ..., Y. Q. Gao. 2009. Free energies and forces in helix-coil transition of homopolypeptides under stretching. *Phys. Chem. Chem. Phys.* 11:4019–4024.

74. Buhot, A., and A. Halperin. 2000. Extension of rod-coil multiblock copolymers and the effect of the helix-coil transition. *Phys. Rev. Lett.* 84:2160–2163.
75. Buhot, A., and A. Halperin. 2002. Extension behavior of helicogenic polypeptides. *Macromolecules.* 35:3238–3252.
76. Williams, L., K. Kather, and D. S. Kemp. 1998. High helicities of Lys-containing, Ala-rich peptides are primarily attributable to a large, context-dependent Lys stabilization. *J. Am. Chem. Soc.* 120:11033–11043.
77. García, A. E., and K. Y. Sanbonmatsu. 2002. Alpha-helical stabilization by side chain shielding of backbone hydrogen bonds. *Proc. Natl. Acad. Sci. USA.* 99:2782–2787.
78. Margulis, C. J., H. A. Stern, and B. J. Berne. 2002. Helix unfolding and intramolecular hydrogen bond dynamics in small  $\alpha$ -helices in explicit solvent. *J. Phys. Chem. B.* 106:10748–10752.
79. Zana, R. 1975. On the rate-determining step for helix propagation in the helix-coil transition of polypeptides in solution. *Biopolymers.* 14:2425–2428.
80. Buchete, N.-V., and J. E. Straub. 2001. Mean first-passage time calculations for the coil-to-helix transition: the active helix ising model. *J. Phys. Chem. B.* 105:6684–6697.
81. Millhauser, G. L., C. J. Stenland, ..., F. J. van de Ven. 1997. Estimating the relative populations of 3(10)-helix and alpha-helix in Ala-rich peptides: a hydrogen exchange and high field NMR study. *J. Mol. Biol.* 267:963–974.
82. Doruker, P., and I. Bahar. 1997. Role of water on unfolding kinetics of helical peptides studied by molecular dynamics simulations. *Biophys. J.* 72:2445–2456.
83. Armen, R., D. O. Alonso, and V. Daggett. 2003. The role of alpha-, 3(10)-, and pi-helix in helix->coil transitions. *Protein Sci.* 12:1145–1157.
84. Lessen, H. J., A. Majumdar, and K. G. Fleming. 2020. Backbone hydrogen bond energies in membrane proteins are insensitive to large changes in local water concentration. *J. Am. Chem. Soc.* 142:6227–6235.
85. Ben-Tal, N., D. Sitkoff, ..., B. Honig. 1997. Free energy of amide hydrogen bond formation in vacuum, in water, and in liquid alkane solution. *J. Phys. Chem. B.* 101:450–457.
86. Baldwin, R. L. 2002. Relation between peptide backbone solvation and the energetics of peptide hydrogen bonds. *Biophys. Chem.* 101–102:203–210.

**Biophysical Journal, Volume 120**

**Supplemental information**

**Energetics and structure of alanine-rich  $\alpha$ -helices via adaptive steered  
molecular dynamics**

**Yi Zhuang, Hailey R. Bureau, Christine Lopez, Ryan Bucher, Stephen Quirk, and Rigoberto  
Hernandez**

## Supplementary Material

# Supplementary Material for “Energetics and structure of alanine-rich $\alpha$ -helices via Adaptive Steered Molecular Dynamics (ASMD)”

Yi Zhuang<sup>1</sup>, Hailey R. Bureau<sup>1</sup>, Christine Lopez<sup>1</sup>, Ryan Bucher<sup>1</sup>, Stephen Quirk<sup>2</sup>, and Rigoberto Hernandez<sup>1,3,\*</sup>

<sup>1</sup>Department of Chemistry, Johns Hopkins University, Baltimore, MD 21218

<sup>2</sup>Kimberly-Clark Corporation, Atlanta, GA 30076-2199

<sup>3</sup>Departments of Chemical and Biomolecular Engineering, and Materials Science and Engineering, Johns Hopkins University, Baltimore, MD 21218

\*Correspondence: r.hernandez@jhu.edu

## CONTENTS

In this supplementary material, we report the potential of mean force (PMF) of stretching Ala<sub>30</sub> at various velocities to illustrate the convergence of the method, an analysis on the polyProline II helix structure along the pulling coordinate, and the Ramachandran plots of the phi-psi angles.

The PMF results are shown in Fig. S1. All simulations reported in the main document and here were carried out using GPUs on XSEDE and MARCC. For the Ala<sub>30</sub> system that was composed of 19,443 atoms and pulled at 100 Å/ns, the computing time for each complete trajectory in the ASMD simulations (~ 1,125 seconds) is about twice as much as in the SMD simulations (~ 600 seconds) on a single K80 node (4 GPUs and 24 processors). However, ASMD provides the same quality of results as SMD with 100 times fewer trajectories. As the pulling speed decreased for ASMD simulations, the computing time increased to 6,250 seconds for 10 Å/ns and to 103,750 seconds for 1 Å/ns for the overall unfolded process. For the lower pulling speed to 0.1 Å/ns, even the smaller system (Ala<sub>10</sub>) requires 128,000 seconds of computing time for each trajectory. In consideration of computational costs and accuracy, we selected 1 Å/ns and 100 trajectories per stage (tps) for the ASMD simulations reported in the main document.

The emergence of polyProline II (pPII) helical structure as the proteins were pulled apart is illustrated in Figs. S2 and S3. A given pair of residues is designated as a pPII helical pair when their ( $\phi$ ,  $\psi$ ) angles are equal to within 10° in deviation from (-75°, 150°). The total number of such pairs is then reported along the JA trajectory in each of the ASMD simulations. Ramachandran plots for the dihedral angles of all the residues along the pulling trajectory are also shown in Figs. S4 and S5 as a function of the unfolding process. As reported in the main text, as the proteins unfold, they lose  $\alpha$ -helical structure. The unfolding proteins go through a series of stages characterized by 3<sub>10</sub> helical structure, pPII helix and random coil in turn.

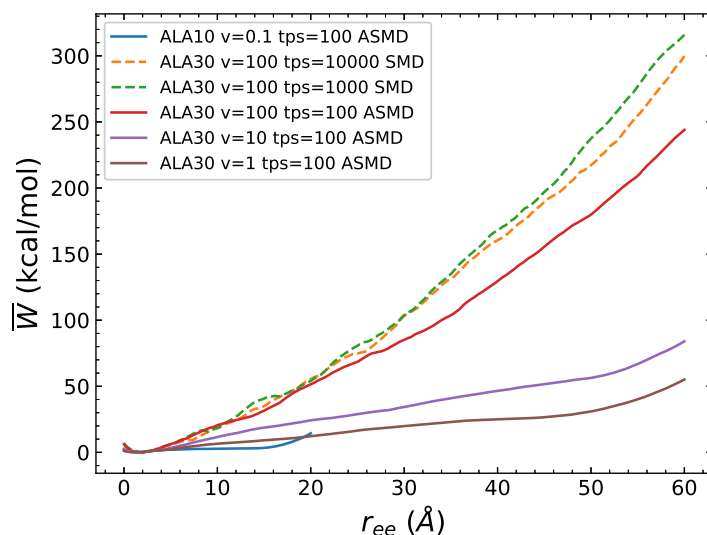

Figure S1: The solid curves are gained from the adaptive steered molecular dynamics (ASMD) simulations for Ala<sub>30</sub> in the explicit water solvent at different pulling speeds (Å/ns) and 100 tps. The dashed curves are the results from SMD simulations, and the solid curves are from ASMD simulations. The decrease in the slope change from 100 Å/ns to 1 Å/ns for Ala<sub>30</sub> indicates the efficiency of ASMD in getting the convergent results in the explicit solvent. In addition, ASMD could provide the same quality of results as SMD with 100 times fewer trajectories.

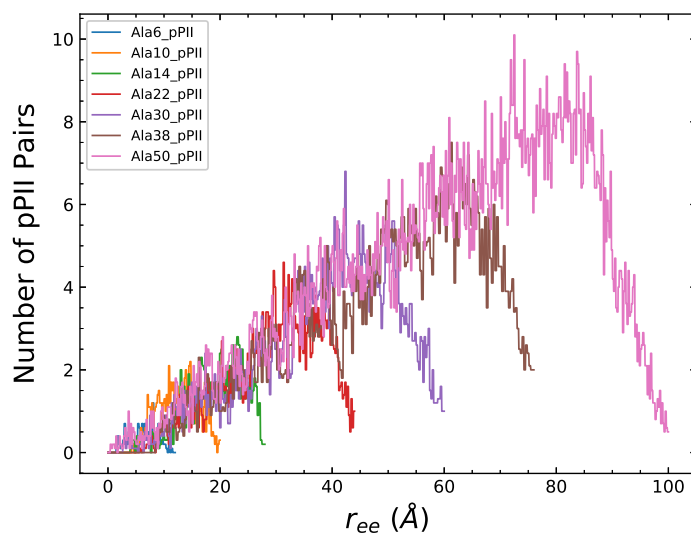

Figure S2: The number of polyproline II (pPII) helix pairs for each polyaniline peptide at 1 Å/ns. Each pair was designated as polyproline II (pPII) helix when the residues adopted angles at (-75°, 150°) with 10° deviations.

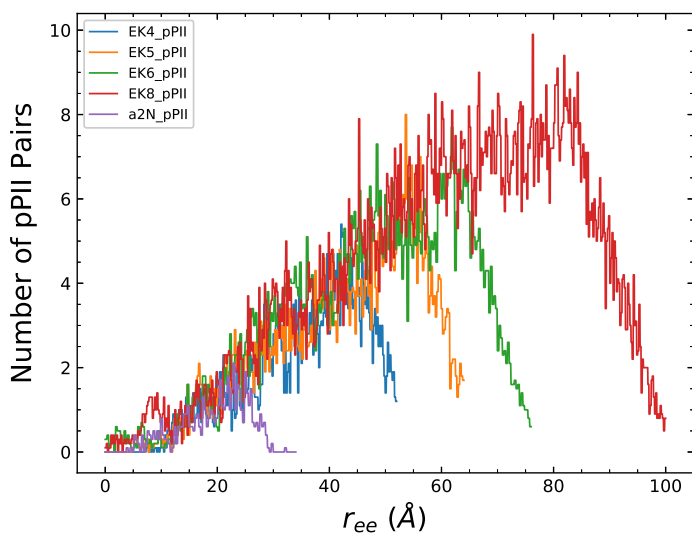

Figure S3: The number of polyproline II (pPII) helix pairs for each soluble peptide (EK and a2N peptides) at 1 Å/ns. Each pair was designated as polyproline II (pPII) helix when the residues adopted angles at  $(-75^\circ, 150^\circ)$  with  $10^\circ$  deviations.

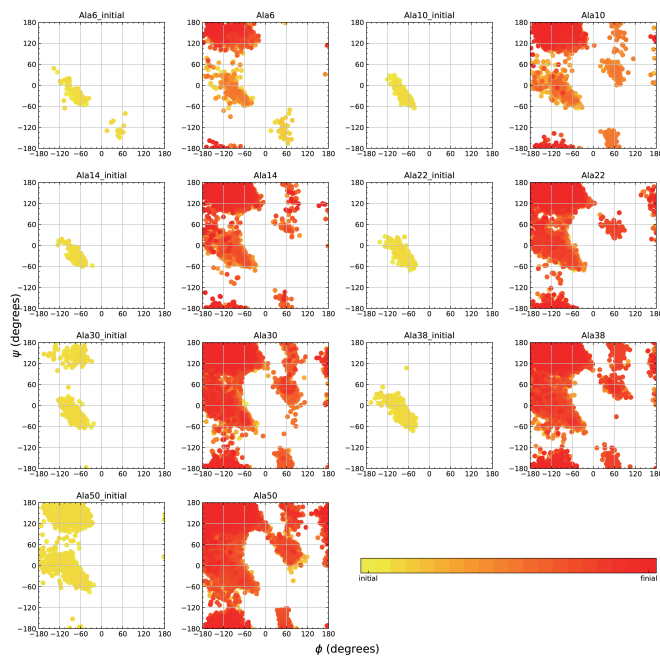

Figure S4: The Ramachandran plot for each polyaniline peptide at 1 Å/ns. For each peptide, the left plot corresponds to the distribution of the initial 10% of the pulling, and the right plot is for the overall unfolding process. For all polyanilines, the structures started with the alpha-helix. They then turned into  $3_{10}$ -helix, polyproline II (pPII) helix structures and random coil in turn.

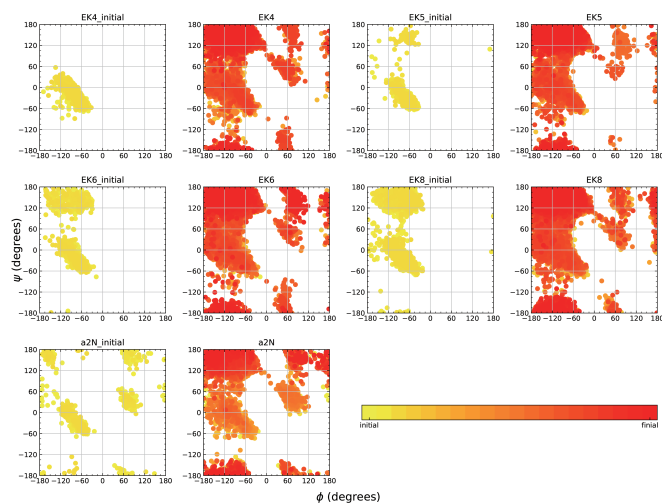

Figure S5: The Ramachandran plot for each soluble peptide (EK and a2N peptides) at 1 Å/ns. For each peptide, the left plot corresponds to the distribution of the initial 10% of pulling, and the right plot is for the overall unfolding process. For all soluble helices, the structures also started with the alpha-helix. They then turned into  $3_{10}$ -helix, polyproline II (pPII) helix structures and random coil in turn as well.
